# Supplementary material for: Expression of maternally derived KHDC3, NLRP5, OOEP and TLE6 is associated with oocyte developmental competence in the ovine species
Source: PubMed Central journal article supplement (PMC4247878; doi:10.1186/s12861-014-0040-y), 2014-11-25
Supplement: 12861_2014_40_MOESM1_ESM.pdf [file 12861_2014_40_MOESM1_ESM.pdf]

**Additional file 1.**

Fragments of ovine *KHDC3/FILIA* and *TLE6* cDNA sequences.

(a) Analysed sequence within the *KHDC3* gene (150 bps).

(b) Analysed sequence within *TLE6* gene (195 bps).

a) *KHDC3*

```
CAGACCCTGCTTCACGTTTCATCAGTGGGACCCGAACGGCGAGGCTGAAATCTTGATATTT  
GGCCGGCCTTATTACCAGCAGGATGTATCCAAGATGATCATGAACTTGGCTAACTATCAC  
CGTCAGCTCCGGGCGCGAAGCTCTGAGAAG
```

b) *TLE6*

```
TACCTGCGCACCTGCCTGCTGTTCTCAAACAGCACAACCCTGCTCACGGGCGGCCACAAC  
CTGGCTGGTGTGAGCCTGTGGGACCTGACGGCGCCTTCCCTGCACGTGAGAGCCGAACTG  
CCCTGCATGGGCTCACCTGCCAGGCCCTGGCTGCCAGCCAGAGGACAGCCTGGCTTTT  
GCTGGCTTCACCAAT
```
